# Supplementary material for: Focused Ultrasound Activation of Cultured Primary Sensory Neurons: Molecular and Biophysical Characterization
Source: Research Square preprint supplement (doi:10.21203/rs.3.rs-6049101/v1), 2025-03-14
Supplement: Supplementary file 2 [file 5ee0a37fd9424e84c80474a8.xlsx]

## Sheet: Feuil1
cell.number	sample_ID	cell.diameter_um	FUS responder	inactivation.subclass	cluster_Zeisel	cluster_Usoskin	cluster_Sharma
1	NWSN92	24.6784	NO	T0	PSNF2	NF4/5	A_Proprioceptor
2	NWSN93	19.8144	NO	T0	PSNP1	TH	C-LTMR
3	NWSN107	27.8016	NO	T0	PSPEP1	PEP2	CGRP_eta-zeta
4	NWSN113	16.0768	NO	T0	PSPEP4	PEP1	CGRP_alpha
5	NWSN114	27.136	NO	T0	PSPEP2/3	PEP1	CGRP_epsilon
6	NWSN119	24.2944	NO	T0	PSPEP2/3	PEP1	CGRP_epsilon
7	NWSN170	29.2608	NO	T0	PSNF2	NF4/5	A_Proprioceptor
8	NWSN130	29.1584	NO	T0	PSNF3	NF2/3	A_beta
9	NWSN132	25.5744	NO	T0	PSPEP1	PEP2	CGRP_eta-zeta
10	NWSN159	31.6416	NO	T0	PSPEP1	PEP2	CGRP_eta-zeta
11	NWSN160	27.8784	NO	T0	PSNF2	NF4/5	A_Proprioceptor
12	NWSN172	28.7744	NO	T0	PSNF3	NF2/3	A_beta
13	NWSN81	21.9904	YES	T2	PSNP2/3	NP1	Mrgprd
14	NWSN82	23.3728	YES	T3	PSPEP1	PEP2	CGRP_eta-zeta
15	NWSN83	15.744	YES	T1	PSNP5	NP2	CGRP-theta
16	NWSN85	24.192	YES	T2	PSNP2/3	NP1	Mrgprd
17	NWSN86	29.9008	YES	T3	PSPEP1	PEP2	CGRP_eta-zeta
18	NWSN87	25.1648	YES	T3	PSNF1	NF1	A_delta_LTMR
19	NWSN91	13.5424	YES	T1	PSNP6	NP3	Sst
20	NWSN102	18.432	YES	T2	PSNP1	TH	C-LTMR
21	NWSN104	16.0768	YES	T3	PSNP1	TH	C-LTMR
22	NWSN105	20.1472	YES	T1	PSNP2/3	NP1	Mrgprd
23	NWSN106	18.3808	YES	T3	PSNP2/3	NP1	Mrgprd
24	NWSN108	13.2352	YES	T2	PSNP1	TH	C-LTMR
25	NWSN112	15.616	YES	T1	PSNP1	TH	C-LTMR
26	NWSN120	22.5024	YES	T2	PSNF1	NF1	A_delta_LTMR
27	NWSN110	14.1312	YES	T2	PSPEP2/3	PEP1	CGRP_epsilon
28	NWSN115	18.0736	YES	T3	PSNP2/3	NP1	Mrgprd
29	NWSN116	24.192	YES	T2	PSNF1	NF1	A_delta_LTMR
30	NWSN117	24.2432	YES	T1	PSPEP1	PEP2	CGRP_eta-zeta
31	NWSN118	18.3808	YES	T3	PSNP5	NP2	CGRP-theta
32	NWSN122	19.8912	YES	T3	PSNP5	NP2	CGRP-theta
33	NWSN123	21.4528	YES	T1	PSNP2/3	NP1	Mrgprd
34	NWSN124	13.3888	YES	T1	PSPEP4	PEP1	CGRP_alpha
35	NWSN127	30.6944	YES	T2	PSNF3	NF2/3	A_beta
36	NWSN129	25.4976	YES	T2	PSNF3	NF2/3	A_beta
37	NWSN131	17.2544	YES	T2	PSNP1	TH	C-LTMR
38	NWSN133	14.3616	YES	T3	PSPEP1	PEP2	CGRP_eta-zeta
39	NWSN137	29.696	YES	T3	PSPEP1	PEP2	CGRP_eta-zeta
40	NWSN138	25.0624	YES	T3	PSNF3	NF2/3	A_beta
41	NWSN141	22.4	YES	T3	PSNP2/3	NP1	Mrgprd
42	NWSN143	23.7568	YES	T2	PSNP1	TH	C-LTMR
43	NWSN144	21.0688	YES	T2	PSNF2	NF4/5	A_Proprioceptor
44	NWSN145	19.4304	YES	T1	PSNP1	TH	C-LTMR
45	NWSN149	19.2	YES	T3	PSNP2/3	NP1	Mrgprd
46	NWSN150	17.4336	YES	T3	PSNP2/3	NP1	Mrgprd
47	NWSN155	22.272	YES	T2	PSNP2/3	NP1	Mrgprd
48	NWSN157	15.0016	YES	T3	PSPEP2/3	PEP1	CGRP_epsilon
49	NWSN158	15.2064	YES	T3	PSNP1	TH	C-LTMR
50	NWSN161	16.4608	YES	T2	PSNP1	TH	C-LTMR
51	NWSN163	18.4832	YES	T3	PSNP1	TH	C-LTMR
52	NWSN165	18.3808	YES	T3	PSNP2/3	NP1	Mrgprd
53	NWSN166	16.5888	YES	T3	PSNP1	TH	C-LTMR
54	NWSN168	15.744	YES	T2	PSNP1	TH	C-LTMR
55	NWSN169	19.9936	YES	T2	PSNP2/3	NP1	Mrgprd
56	NWSN171	18.816	YES	T3	PSNP2/3	NP1	Mrgprd
57	NWSN174	30.592	YES	T3	PSNF1	NF1	A_delta_LTMR
