# Supplementary material for: Focused Ultrasound Activation of Cultured Primary Sensory Neurons: Molecular and Biophysical Characterization
Source: Research Square preprint supplement (doi:10.21203/rs.3.rs-6049101/v1), 2025-03-14
Supplement: Supplementary file 3 [file 85fbd2843edc43a90e1de45f.xlsx]

## Sheet: Feuil1
ensembl	turquoise		ensembl	brown		ensembl	blue
ENSMUSG00000100691	2010320M18Rik		ENSMUSG00000043747	1520401A03Rik		ENSMUSG00000039195	1110008P14Rik
ENSMUSG00000047368	Abhd17b		ENSMUSG00000097178	2310002F09Rik		ENSMUSG00000030030	1700003E16Rik
ENSMUSG00000078453	Abracl		ENSMUSG00000085761	4930455G09Rik		ENSMUSG00000071265	1700086L19Rik
ENSMUSG00000020152	Actr2		ENSMUSG00000054457	9430021M05Rik		ENSMUSG00000087013	2610027K06Rik
ENSMUSG00000062753	AI413582		ENSMUSG00000078776	9530053A07Rik		ENSMUSG00000055972	2810407A14Rik
ENSMUSG00000029465	Arpc3		ENSMUSG00000032561	Acpp		ENSMUSG00000087038	2900079G21Rik
ENSMUSG00000007656	Arpp19		ENSMUSG00000056492	Adgrf5		ENSMUSG00000097276	4930525G20Rik
ENSMUSG00000038539	Atf5		ENSMUSG00000039197	Adk		ENSMUSG00000040840	4930579G18Rik
ENSMUSG00000079418	Atg4a		ENSMUSG00000054136	Adm2		ENSMUSG00000075463	4930594M22Rik
ENSMUSG00000039105	Atp6v1g1		ENSMUSG00000031189	Aff2		ENSMUSG00000072893	4933439C10Rik
ENSMUSG00000022051	Bnip3l		ENSMUSG00000049115	Agtr1a		ENSMUSG00000037977	6430571L13Rik
ENSMUSG00000029458	Brap		ENSMUSG00000069833	Ahnak		ENSMUSG00000097061	9330151L19Rik
ENSMUSG00000021660	Btf3		ENSMUSG00000024897	Apba1		ENSMUSG00000087466	A330041J22Rik
ENSMUSG00000089782	Btf3-ps1		ENSMUSG00000000049	Apoh		ENSMUSG00000026596	Abl2
ENSMUSG00000110165	Btf3-ps18		ENSMUSG00000025432	Avil		ENSMUSG00000023328	Ache
ENSMUSG00000087239	Btf3-ps2		ENSMUSG00000068463	B630019A10Rik		ENSMUSG00000025964	Adam23
ENSMUSG00000082793	Btf3-ps4		ENSMUSG00000045231	BC106179		ENSMUSG00000024747	Aldh1a7
ENSMUSG00000036478	Btg1		ENSMUSG00000085560	C230038L03Rik		ENSMUSG00000060244	Alyref2
ENSMUSG00000116884	C130040N14Rik		ENSMUSG00000007655	Cav1		ENSMUSG00000023047	Amhr2
ENSMUSG00000030319	Cand2		ENSMUSG00000006362	Cbfa2t3		ENSMUSG00000048218	Amigo2
ENSMUSG00000043913	Ccdc60		ENSMUSG00000058925	Ccdc192		ENSMUSG00000039623	Ap5z1
ENSMUSG00000006699	Cdc42		ENSMUSG00000067872	Ccdc87		ENSMUSG00000002985	Apoe
ENSMUSG00000021537	Cetn3		ENSMUSG00000047139	Cd24a		ENSMUSG00000037509	Arhgef4
ENSMUSG00000038467	Chmp4b		ENSMUSG00000005087	Cd44		ENSMUSG00000007097	Atp1a2
ENSMUSG00000041777	Cir1		ENSMUSG00000055447	Cd47		ENSMUSG00000026576	Atp1b1
ENSMUSG00000098650	Commd1b		ENSMUSG00000026399	Cd55		ENSMUSG00000028710	Atpaf1
ENSMUSG00000025408	Ddit3		ENSMUSG00000026401	Cd55b		ENSMUSG00000021460	Auh
ENSMUSG00000116429	Ddit3		ENSMUSG00000027215	Cd82		ENSMUSG00000051844	B230319C09Rik
ENSMUSG00000022048	Dpysl2		ENSMUSG00000000303	Cdh1		ENSMUSG00000032263	Bckdhb
ENSMUSG00000027012	Dync1i2		ENSMUSG00000022321	Cdh10		ENSMUSG00000105509	C130013H08Rik
ENSMUSG00000092074	Dynlt1a		ENSMUSG00000058793	Cds2		ENSMUSG00000034889	Cactin
ENSMUSG00000095677	Dynlt1f		ENSMUSG00000021572	Cep72		ENSMUSG00000019370	Calm3
ENSMUSG00000037742	Eef1a1		ENSMUSG00000037143	Cfap61		ENSMUSG00000027555	Car13
ENSMUSG00000117822	Eef1a1-ps1		ENSMUSG00000041012	Cmtm8		ENSMUSG00000050357	Carmil2
ENSMUSG00000074656	Eif2s2		ENSMUSG00000038591	Colec10		ENSMUSG00000029875	Ccdc184
ENSMUSG00000026254	Eif4e2		ENSMUSG00000028337	Coro2a		ENSMUSG00000037979	Ccdc92
ENSMUSG00000046337	Fam178b		ENSMUSG00000071553	Cpa2		ENSMUSG00000019818	Cd164
ENSMUSG00000073633	Fbxo36		ENSMUSG00000028228	Cpne3		ENSMUSG00000060703	Cd302
ENSMUSG00000021243	Fcf1		ENSMUSG00000021477	Ctsl		ENSMUSG00000040452	Cdh12
ENSMUSG00000059743	Fdps		ENSMUSG00000069372	Ctxn3		ENSMUSG00000023031	Cela1
ENSMUSG00000031137	Fgf13		ENSMUSG00000021559	Dapk1		ENSMUSG00000045031	Cetn4
ENSMUSG00000050708	Ftl1		ENSMUSG00000031285	Dcx		ENSMUSG00000027350	Chgb
ENSMUSG00000027680	Fxr1		ENSMUSG00000037921	Ddx60		ENSMUSG00000026080	Chst10
ENSMUSG00000059412	Fxyd2		ENSMUSG00000023000	Dhh		ENSMUSG00000002280	Ciao3
ENSMUSG00000018567	Gabarap		ENSMUSG00000030768	Disp1		ENSMUSG00000001270	Ckb
ENSMUSG00000056880	Gadl1		ENSMUSG00000027606	Dnajc5b		ENSMUSG00000008153	Clstn3
ENSMUSG00000053332	Gas5		ENSMUSG00000025279	Dnase1l3		ENSMUSG00000055022	Cntn1
ENSMUSG00000060143	Gm10076		ENSMUSG00000068335	Dok1		ENSMUSG00000027966	Col11a1
ENSMUSG00000112909	Gm10120		ENSMUSG00000037681	Esyt3		ENSMUSG00000033615	Cplx1
ENSMUSG00000063556	Gm10132		ENSMUSG00000034898	Filip1		ENSMUSG00000040713	Creg1
ENSMUSG00000063754	Gm10136		ENSMUSG00000048756	Foxo3		ENSMUSG00000022551	Cyc1
ENSMUSG00000110350	Gm10252		ENSMUSG00000022297	Fzd6		ENSMUSG00000036731	Cysrt1
ENSMUSG00000066407	Gm10263		ENSMUSG00000031714	Gab1		ENSMUSG00000037993	Dhx38
ENSMUSG00000091449	Gm10269		ENSMUSG00000027774	Gfm1		ENSMUSG00000024456	Diaph1
ENSMUSG00000079357	Gm11100		ENSMUSG00000022103	Gfra2		ENSMUSG00000005483	Dnajb1
ENSMUSG00000082998	Gm11221		ENSMUSG00000086122	Gm14507		ENSMUSG00000075467	Dnlz
ENSMUSG00000081691	Gm11965		ENSMUSG00000086742	Gm16201		ENSMUSG00000075419	Dolk
ENSMUSG00000085342	Gm12254		ENSMUSG00000118391	Gm19519		ENSMUSG00000022122	Ednrb
ENSMUSG00000082983	Gm12318		ENSMUSG00000093502	Gm20700		ENSMUSG00000015467	Egfl8
ENSMUSG00000081329	Gm12492		ENSMUSG00000097240	Gm26614		ENSMUSG00000035105	Egln3
ENSMUSG00000083220	Gm12919		ENSMUSG00000099686	Gm29460		ENSMUSG00000074364	Ehd2
ENSMUSG00000080944	Gm12967		ENSMUSG00000113390	Gm32635		ENSMUSG00000041773	Enc1
ENSMUSG00000083852	Gm13007		ENSMUSG00000110605	Gm32856		ENSMUSG00000037419	Endod1
ENSMUSG00000083240	Gm13453		ENSMUSG00000117007	Gm41556		ENSMUSG00000078161	Erich3
ENSMUSG00000082536	Gm13456		ENSMUSG00000108313	Gm45052		ENSMUSG00000023011	Faim2
ENSMUSG00000081400	Gm13680		ENSMUSG00000114436	Gm48283		ENSMUSG00000041556	Fbxo2
ENSMUSG00000082647	Gm14056		ENSMUSG00000117569	Gm49987		ENSMUSG00000048230	Fbxo43
ENSMUSG00000085682	Gm14267		ENSMUSG00000115196	Gm6212		ENSMUSG00000024965	Fermt3
ENSMUSG00000080811	Gm14513		ENSMUSG00000100009	Gm7967		ENSMUSG00000020327	Fgf22
ENSMUSG00000083482	Gm14706		ENSMUSG00000056316	Gm9996		ENSMUSG00000015994	Fnta
ENSMUSG00000083699	Gm14932		ENSMUSG00000024697	Gna14		ENSMUSG00000036570	Fxyd1
ENSMUSG00000086583	Gm15500		ENSMUSG00000043004	Gng2		ENSMUSG00000022148	Fyb
ENSMUSG00000081745	Gm15549		ENSMUSG00000020017	Hal		ENSMUSG00000090035	Galnt4
ENSMUSG00000089695	Gm15946		ENSMUSG00000004698	Hdac9		ENSMUSG00000033316	Galnt9
ENSMUSG00000089988	Gm16238		ENSMUSG00000019791	Hint3		ENSMUSG00000031451	Gas6
ENSMUSG00000097793	Gm17259		ENSMUSG00000062184	Hs6st2		ENSMUSG00000053329	Gatd3a
ENSMUSG00000090963	Gm17655		ENSMUSG00000026322	Htr4		ENSMUSG00000097430	Gm10544
ENSMUSG00000091367	Gm17711		ENSMUSG00000079017	Ifi27l2a		ENSMUSG00000082893	Gm11383
ENSMUSG00000097987	Gm17786		ENSMUSG00000079339	Ifit1bl1		ENSMUSG00000086193	Gm11508
ENSMUSG00000108125	Gm17812		ENSMUSG00000042035	Igsf3		ENSMUSG00000081852	Gm12281
ENSMUSG00000103797	Gm18964		ENSMUSG00000028068	Iqgap3		ENSMUSG00000086526	Gm12762
ENSMUSG00000114133	Gm20075		ENSMUSG00000059852	Kcng2		ENSMUSG00000083679	Gm12892
ENSMUSG00000115010	Gm20150		ENSMUSG00000029088	Kcnip4		ENSMUSG00000086018	Gm13179
ENSMUSG00000105233	Gm20568		ENSMUSG00000045404	Kcnk13		ENSMUSG00000042938	Gm14117
ENSMUSG00000103355	Gm2147		ENSMUSG00000020155	Kcnmb1		ENSMUSG00000068062	Gm14164
ENSMUSG00000076138	Gm26377		ENSMUSG00000054934	Kcnmb4		ENSMUSG00000075416	Gm14488
ENSMUSG00000099658	Gm28980		ENSMUSG00000060012	Kif13b		ENSMUSG00000082554	Gm15806
ENSMUSG00000083700	Gm2986		ENSMUSG00000005148	Klf5		ENSMUSG00000087429	Gm16235
ENSMUSG00000099797	Gm3145		ENSMUSG00000054920	Klhl5		ENSMUSG00000087002	Gm16277
ENSMUSG00000115284	Gm34678		ENSMUSG00000074155	Klk5		ENSMUSG00000091768	Gm17617
ENSMUSG00000102914	Gm35106		ENSMUSG00000064023	Klk8		ENSMUSG00000000594	Gm2a
ENSMUSG00000105031	Gm3511		ENSMUSG00000017588	Krt27		ENSMUSG00000109590	Gm32710
ENSMUSG00000090610	Gm3571		ENSMUSG00000045312	Lhfpl2		ENSMUSG00000104002	Gm38336
ENSMUSG00000094955	Gm3699		ENSMUSG00000036832	Lpar3		ENSMUSG00000105807	Gm42622
ENSMUSG00000114162	Gm3785		ENSMUSG00000052316	Lrrc15		ENSMUSG00000107770	Gm44126
ENSMUSG00000094392	Gm3788		ENSMUSG00000021423	Ly86		ENSMUSG00000109829	Gm45605
ENSMUSG00000113858	Gm4057		ENSMUSG00000056947	Mab21l1		ENSMUSG00000110070	Gm45619
ENSMUSG00000074800	Gm4149		ENSMUSG00000024479	Mal2		ENSMUSG00000110702	Gm45767
ENSMUSG00000106530	Gm42430		ENSMUSG00000024558	Mapk4		ENSMUSG00000114165	Gm47513
ENSMUSG00000106324	Gm43222		ENSMUSG00000038732	Mboat1		ENSMUSG00000111447	Gm48249
ENSMUSG00000106037	Gm4332		ENSMUSG00000001150	Mcm3ap		ENSMUSG00000115222	Gm49747
ENSMUSG00000083911	Gm4342		ENSMUSG00000068117	Mei1		ENSMUSG00000116657	Gm49774
ENSMUSG00000104761	Gm43511		ENSMUSG00000026110	Mgat4a		ENSMUSG00000107747	Gm5881
ENSMUSG00000105204	Gm43738		ENSMUSG00000098489	Mir7678		ENSMUSG00000101612	Gm7933
ENSMUSG00000107954	Gm43942		ENSMUSG00000035805	Mlc1		ENSMUSG00000105975	Gm9831
ENSMUSG00000110279	Gm45552		ENSMUSG00000023903	Mmp25		ENSMUSG00000040009	Gnaz
ENSMUSG00000116529	Gm4600		ENSMUSG00000020000	Moxd1		ENSMUSG00000032766	Gng11
ENSMUSG00000090467	Gm4613		ENSMUSG00000070551	Mrgprb5		ENSMUSG00000058571	Gpc6
ENSMUSG00000111163	Gm46136		ENSMUSG00000051207	Mrgprd		ENSMUSG00000047875	Gpr157
ENSMUSG00000114110	Gm46379		ENSMUSG00000099560	Mrgprx3-ps		ENSMUSG00000032348	Gsta4
ENSMUSG00000116562	Gm46542		ENSMUSG00000024681	Ms4a3		ENSMUSG00000061046	Haghl
ENSMUSG00000107850	Gm4714		ENSMUSG00000025912	Mybl1		ENSMUSG00000032523	Hhatl
ENSMUSG00000111201	Gm47178		ENSMUSG00000022443	Myh9		ENSMUSG00000000938	Hoxa10
ENSMUSG00000106895	Gm4754		ENSMUSG00000010505	Myt1		ENSMUSG00000000690	Hoxb6
ENSMUSG00000114036	Gm48228		ENSMUSG00000077990	NA		ENSMUSG00000043342	Hoxd9
ENSMUSG00000105077	Gm4859		ENSMUSG00000041120	Nbl1		ENSMUSG00000074811	Hps6
ENSMUSG00000114137	Gm48685		ENSMUSG00000032012	Nectin1		ENSMUSG00000031844	Hsd17b2
ENSMUSG00000116131	Gm49506		ENSMUSG00000042185	Nfrkb		ENSMUSG00000032269	Htr3a
ENSMUSG00000111613	Gm4977		ENSMUSG00000067786	Nnat		ENSMUSG00000020053	Igf1
ENSMUSG00000095847	Gm5451		ENSMUSG00000032420	Nt5e		ENSMUSG00000034312	Iqsec1
ENSMUSG00000061848	Gm5805		ENSMUSG00000030717	Nupr1		ENSMUSG00000042284	Itga1
ENSMUSG00000093651	Gm5873		ENSMUSG00000066861	Oas1g		ENSMUSG00000095115	Itpripl2
ENSMUSG00000110275	Gm5905		ENSMUSG00000034990	Otoa		ENSMUSG00000040724	Kcna2
ENSMUSG00000081159	Gm6023		ENSMUSG00000042323	Pbrm1		ENSMUSG00000024957	Kcnk4
ENSMUSG00000104616	Gm6069		ENSMUSG00000036062	Phf24		ENSMUSG00000040164	Kcns1
ENSMUSG00000100078	Gm6170		ENSMUSG00000035268	Pkig		ENSMUSG00000020668	Kif3c
ENSMUSG00000118220	Gm6192		ENSMUSG00000024960	Plcb3		ENSMUSG00000021288	Klc1
ENSMUSG00000105879	Gm6204		ENSMUSG00000074785	Plxnc1		ENSMUSG00000006307	Kmt2b
ENSMUSG00000104623	Gm6394		ENSMUSG00000027784	Ppm1l		ENSMUSG00000066129	Kndc1
ENSMUSG00000116694	Gm6440		ENSMUSG00000026778	Prkcq		ENSMUSG00000046834	Krt1
ENSMUSG00000114023	Gm6474		ENSMUSG00000030854	Ptpn5		ENSMUSG00000019718	L3hypdh
ENSMUSG00000081453	Gm6767		ENSMUSG00000053141	Ptprt		ENSMUSG00000044350	Lacc1
ENSMUSG00000117875	Gm6789		ENSMUSG00000032202	Rab27a		ENSMUSG00000022257	Laptm4b
ENSMUSG00000043483	Gm6863		ENSMUSG00000024511	Rab27b		ENSMUSG00000034839	Larp6
ENSMUSG00000108608	Gm6916		ENSMUSG00000050029	Rap2c		ENSMUSG00000060594	Layn
ENSMUSG00000090074	Gm6921		ENSMUSG00000027347	Rasgrp1		ENSMUSG00000003872	Lin7b
ENSMUSG00000110173	Gm6929		ENSMUSG00000061979	Rcc1l		ENSMUSG00000033060	Lmo7
ENSMUSG00000113198	Gm6988		ENSMUSG00000030844	Rgs10		ENSMUSG00000047766	Lrrc49
ENSMUSG00000118345	Gm7105		ENSMUSG00000042671	Rgs8		ENSMUSG00000032184	Lysmd2
ENSMUSG00000082475	Gm7206		ENSMUSG00000023809	Rps6ka2		ENSMUSG00000031227	Magee1
ENSMUSG00000109255	Gm7407		ENSMUSG00000051920	Rspo2		ENSMUSG00000035027	Map2k2
ENSMUSG00000112605	Gm7476		ENSMUSG00000022952	Runx1		ENSMUSG00000033902	Mapkbp1
ENSMUSG00000116818	Gm7513		ENSMUSG00000073394	Runx2os1		ENSMUSG00000029166	Mapre3
ENSMUSG00000109933	Gm7600		ENSMUSG00000037071	Scd1		ENSMUSG00000086392	Mccc1os
ENSMUSG00000113859	Gm7979		ENSMUSG00000032181	Scg3		ENSMUSG00000030120	Mlf2
ENSMUSG00000111548	Gm8162		ENSMUSG00000034115	Scn11a		ENSMUSG00000005370	Msh6
ENSMUSG00000116861	Gm8253		ENSMUSG00000028780	Sema3c		ENSMUSG00000068922	Msto1
ENSMUSG00000110825	Gm8959		ENSMUSG00000063232	Serpina11		ENSMUSG00000021144	Mta1
ENSMUSG00000109059	Gm9354		ENSMUSG00000023764	Sfi1		ENSMUSG00000048142	Nat8l
ENSMUSG00000080848	Gm9385		ENSMUSG00000029416	Slc15a4		ENSMUSG00000020181	Nav3
ENSMUSG00000106313	Gm9402		ENSMUSG00000009378	Slc16a12		ENSMUSG00000022762	Ncam2
ENSMUSG00000114003	Gm9616		ENSMUSG00000017002	Slpi		ENSMUSG00000027634	Ndrg3
ENSMUSG00000107176	Gm9794		ENSMUSG00000048442	Smim5		ENSMUSG00000036564	Ndrg4
ENSMUSG00000045799	Gm9800		ENSMUSG00000055485	Soga1		ENSMUSG00000020396	Nefh
ENSMUSG00000050299	Gm9843		ENSMUSG00000061887	Ssbp3		ENSMUSG00000022055	Nefl
ENSMUSG00000091955	Gm9844		ENSMUSG00000024172	St6gal2		ENSMUSG00000022054	Nefm
ENSMUSG00000052825	Gm9892		ENSMUSG00000039954	Stk32a		ENSMUSG00000040037	Negr1
ENSMUSG00000081985	Gng2-ps1		ENSMUSG00000026880	Stom		ENSMUSG00000048540	Nhlh2
ENSMUSG00000071658	Gng3		ENSMUSG00000020961	Ston2		ENSMUSG00000021567	Nkd2
ENSMUSG00000068523	Gng5		ENSMUSG00000056296	Synpr		ENSMUSG00000063887	Nlgn1
ENSMUSG00000082241	Gng5-ps		ENSMUSG00000062542	Syt9		ENSMUSG00000059146	Ntrk3
ENSMUSG00000066551	Hmgb1		ENSMUSG00000079278	Tmem233		ENSMUSG00000062257	Opcml
ENSMUSG00000063172	Hspb11		ENSMUSG00000015829	Tnr		ENSMUSG00000041161	Otud3
ENSMUSG00000083287	Idi1-ps1		ENSMUSG00000046275	Trarg1		ENSMUSG00000024855	Pacs1
ENSMUSG00000111355	Idi1-ps3		ENSMUSG00000085912	Trp53cor1		ENSMUSG00000040276	Pacsin1
ENSMUSG00000023150	Ivns1abp		ENSMUSG00000028211	Trp53inp1		ENSMUSG00000031860	Pbx4
ENSMUSG00000030677	Kif22		ENSMUSG00000032769	Trpa1		ENSMUSG00000055421	Pcdh9
ENSMUSG00000031513	Leprotl1		ENSMUSG00000027716	Trpc3		ENSMUSG00000038370	Pcp4l1
ENSMUSG00000020224	Llph		ENSMUSG00000034485	Uaca		ENSMUSG00000027419	Pcsk2
ENSMUSG00000081459	Llph-ps1		ENSMUSG00000026956	Uap1l1		ENSMUSG00000087115	Pcsk2os2
ENSMUSG00000083364	Llph-ps2		ENSMUSG00000019951	Uhrf1bp1l		ENSMUSG00000020388	Pdlim4
ENSMUSG00000047557	Lxn		ENSMUSG00000062151	Unc13c		ENSMUSG00000074818	Pdzd7
ENSMUSG00000028609	Magoh		ENSMUSG00000063626	Unc5d		ENSMUSG00000106847	Peg13
ENSMUSG00000069662	Marcks		ENSMUSG00000086040	Wipf3		ENSMUSG00000027805	Pfn2
ENSMUSG00000040354	Mars1		ENSMUSG00000050945	Zfp438		ENSMUSG00000020205	Phlda1
ENSMUSG00000030291	Med21		ENSMUSG00000062761	Zfp512		ENSMUSG00000037747	Phyhipl
ENSMUSG00000051730	Mettl5		ENSMUSG00000057409	Zfp53		ENSMUSG00000032171	Pin1
ENSMUSG00000023074	Mospd1		ENSMUSG00000055202	Zfp811		ENSMUSG00000031538	Plat
ENSMUSG00000016833	Mrps18c		ENSMUSG00000078495	Zfp984		ENSMUSG00000021759	Plpp1
ENSMUSG00000076036	NA					ENSMUSG00000026179	Pnkd
ENSMUSG00000076232	NA					ENSMUSG00000041141	Pnmal1
ENSMUSG00000092812	NA					ENSMUSG00000029725	Ppp1r35
ENSMUSG00000093816	NA					ENSMUSG00000048960	Prex2
ENSMUSG00000061315	Naca					ENSMUSG00000048992	Prss32
ENSMUSG00000024056	Ndc80					ENSMUSG00000033491	Prss35
ENSMUSG00000026946	Nmi					ENSMUSG00000028036	Ptgfr
ENSMUSG00000020297	Nsg2					ENSMUSG00000026604	Ptpn14
ENSMUSG00000027835	Pdcd10					ENSMUSG00000033059	Pygb
ENSMUSG00000021118	Plek2					ENSMUSG00000051343	Rab11fip5
ENSMUSG00000027952	Pmvk					ENSMUSG00000002059	Rab34
ENSMUSG00000022092	Ppp3cc					ENSMUSG00000031840	Rab3a
ENSMUSG00000023048	Prr13					ENSMUSG00000043518	Rai2
ENSMUSG00000028932	Psmc2					ENSMUSG00000020374	Rasgef1c
ENSMUSG00000079197	Psme2					ENSMUSG00000027339	Rassf2
ENSMUSG00000078153	Psme2b					ENSMUSG00000035275	Raver2
ENSMUSG00000071072	Ptges3					ENSMUSG00000040043	Rbms2
ENSMUSG00000026238	Ptma					ENSMUSG00000038195	Rilp
ENSMUSG00000030122	Ptms					ENSMUSG00000044628	Rnf208
ENSMUSG00000020415	Pttg1					ENSMUSG00000021087	Rtn1
ENSMUSG00000078184	Rbm8a2					ENSMUSG00000067586	S1pr3
ENSMUSG00000049832	Rbx1-ps					ENSMUSG00000049091	Sephs2
ENSMUSG00000028557	Rnf11					ENSMUSG00000079049	Serpinb1c
ENSMUSG00000008682	Rpl10					ENSMUSG00000024548	Setbp1
ENSMUSG00000058443	Rpl10-ps3					ENSMUSG00000040848	Sft2d2
ENSMUSG00000081094	Rpl19-ps11					ENSMUSG00000041920	Slc16a6
ENSMUSG00000115737	Rpl19-ps3					ENSMUSG00000014606	Slc25a11
ENSMUSG00000116090	Rpl19-ps6					ENSMUSG00000024891	Slc29a2
ENSMUSG00000071415	Rpl23					ENSMUSG00000050822	Slc29a4
ENSMUSG00000078126	Rpl23a-ps3					ENSMUSG00000075478	Slitrk1
ENSMUSG00000060938	Rpl26					ENSMUSG00000029281	Smr2
ENSMUSG00000030432	Rpl28					ENSMUSG00000018809	Smyd4
ENSMUSG00000057841	Rpl32					ENSMUSG00000027273	Snap25
ENSMUSG00000062006	Rpl34					ENSMUSG00000033006	Sox10
ENSMUSG00000062997	Rpl35					ENSMUSG00000005803	Sqor
ENSMUSG00000060636	Rpl35a					ENSMUSG00000056091	St3gal5
ENSMUSG00000093885	Rpl35a-ps5					ENSMUSG00000026277	Stk25
ENSMUSG00000049751	Rpl36al					ENSMUSG00000030806	Stx1b
ENSMUSG00000105388	Rpl36a-ps2					ENSMUSG00000053025	Sv2b
ENSMUSG00000071141	Rpl36a-ps3					ENSMUSG00000058420	Syt17
ENSMUSG00000046330	Rpl37a					ENSMUSG00000000093	Tbx2
ENSMUSG00000072692	Rpl37rt					ENSMUSG00000031409	Tceal6
ENSMUSG00000093674	Rpl41					ENSMUSG00000001472	Tcf25
ENSMUSG00000062456	Rpl9-ps6					ENSMUSG00000017466	Timp2
ENSMUSG00000084185	Rplp1-ps1					ENSMUSG00000046157	Tmem229b
ENSMUSG00000003429	Rps11					ENSMUSG00000038457	Tmem255b
ENSMUSG00000081929	Rps11-ps2					ENSMUSG00000028786	Tmem54
ENSMUSG00000082481	Rps12-ps19					ENSMUSG00000033177	Tmprss7
ENSMUSG00000024608	Rps14					ENSMUSG00000018752	Tnfsfm13
ENSMUSG00000008683	Rps15a					ENSMUSG00000005674	Tomm40l
ENSMUSG00000067058	Rps15a-ps5					ENSMUSG00000050663	Trhde
ENSMUSG00000081087	Rps15a-ps7					ENSMUSG00000044328	Trp53i13
ENSMUSG00000096681	Rps19-ps1					ENSMUSG00000025511	Tspan4
ENSMUSG00000096942	Rps19-ps6					ENSMUSG00000030337	Vamp1
ENSMUSG00000028234	Rps20					ENSMUSG00000037843	Vstm2l
ENSMUSG00000081049	Rps24-ps3					ENSMUSG00000000983	Wfdc18
ENSMUSG00000025362	Rps26					ENSMUSG00000041245	Wnk3
ENSMUSG00000059775	Rps26-ps1					ENSMUSG00000043903	Zfp469
ENSMUSG00000090733	Rps27					ENSMUSG00000019338	Zfp687
ENSMUSG00000058838	Rps27a-ps2
ENSMUSG00000036781	Rps27l
ENSMUSG00000050621	Rps27rt
ENSMUSG00000067288	Rps28
ENSMUSG00000030744	Rps3
ENSMUSG00000059751	Rps3a3
ENSMUSG00000012848	Rps5
ENSMUSG00000047675	Rps8
ENSMUSG00000071303	Rps8-ps1
ENSMUSG00000006333	Rps9
ENSMUSG00000045055	Rpsa-ps2
ENSMUSG00000039153	Runx2
ENSMUSG00000041959	S100a10
ENSMUSG00000001025	S100a6
ENSMUSG00000042682	Selenok
ENSMUSG00000085415	Selenok-ps1
ENSMUSG00000113504	Selenok-ps5
ENSMUSG00000105474	Selenok-ps7
ENSMUSG00000113014	Selenok-ps8
ENSMUSG00000052180	Serpinb6c
ENSMUSG00000054766	Set
ENSMUSG00000037361	Sf3b6
ENSMUSG00000028843	Sh3bgrl3
ENSMUSG00000023064	Sncg
ENSMUSG00000001158	Snrnp27
ENSMUSG00000040824	Snrpd2
ENSMUSG00000038301	Snx10
ENSMUSG00000028832	Stmn1
ENSMUSG00000022205	Sub1
ENSMUSG00000071359	Tbpl1
ENSMUSG00000042712	Tceal9
ENSMUSG00000053453	Thoc7
ENSMUSG00000040234	Tm7sf3
ENSMUSG00000023010	Tmbim6
ENSMUSG00000036372	Tmem258
ENSMUSG00000079523	Tmsb10
ENSMUSG00000049775	Tmsb4x
ENSMUSG00000028367	Txn1
ENSMUSG00000101567	Txn-ps1
ENSMUSG00000061613	U2af1
ENSMUSG00000025939	Ube2w
ENSMUSG00000012126	Ubxn11
ENSMUSG00000005262	Ufd1
ENSMUSG00000022313	Utp23
ENSMUSG00000074578	Zfas1
ENSMUSG00000092335	Zfp977
