# Supplementary material for: Focused Ultrasound Activation of Cultured Primary Sensory Neurons: Molecular and Biophysical Characterization
Source: Research Square preprint supplement (doi:10.21203/rs.3.rs-6049101/v1), 2025-03-14
Supplement: Supplementary file 5 [file f726fedd59e49a3e65f89547.xlsx]

## Sheet: Feuil1
GO.ID	Term	number of gene	p.value	module	entrezID
GO:0045454	cell redox homeostasis	2	0.00076	turquoise	13198/22166
GO:0070059	intrinsic apoptotic signaling pathway in response to endoplasmic reticulum stress	3	0.00361	turquoise	110213/13198/80795
GO:0043525	positive regulation of neuron apoptotic process	2	0.00457	turquoise	12540/13198
GO:0051496	positive regulation of stress fiber assembly	2	0.00457	turquoise	12540/20194
GO:1900026	positive regulation of substrate adhesion-dependent cell spreading	2	0.00457	turquoise	12540/20194
GO:0072659	protein localization to plasma membrane	2	0.00571	turquoise	14168/20194
GO:0009306	protein secretion	2	0.008	turquoise	20618/67623
GO:0048488	synaptic vesicle endocytosis	2	0.008	turquoise	19057/20618
GO:0050808	synapse organization	7	0.00833	turquoise	12540/14168/17118/20618/226016/66713/75608
GO:0032469	endoplasmic reticulum calcium ion homeostasis	2	0.01524	turquoise	110213/80795
GO:0009314	response to radiation	2	0.016	turquoise	19941/22166
GO:0045893	positive regulation of DNA-templated transcription	13	0.02632	turquoise	107503/108098/12393/13198/15289/19231/19241/20024/20194/216443/66713/69202/70380
GO:0036119	response to platelet-derived growth factor	2	0.032	turquoise	13198/216443
GO:0072655	establishment of protein localization to mitochondrion	2	0.032	turquoise	12177/13198
GO:0042594	response to starvation	3	0.03226	turquoise	13198/216443/56486
GO:0051091	positive regulation of DNA-binding transcription factor activity	3	0.03226	turquoise	13198/19231/27050
GO:2001244	positive regulation of intrinsic apoptotic signaling pathway	3	0.03226	turquoise	13198/19941/27050
GO:0009611	response to wounding	6	0.03306	turquoise	13198/15289/17938/20194/56426/75608
GO:0000462	maturation of SSU-rRNA from tricistronic rRNA transcript (SSU-rRNA, 5.8S rRNA, LSU-rRNA)	4	0.03318	turquoise	20044/20116/73736/78581
GO:0010592	positive regulation of lamellipodium assembly	2	0.03505	turquoise	12540/66713
GO:0051726	regulation of cell cycle	13	0.03509	turquoise	107503/12226/12540/13198/15289/19188/19941/267019/30939/65019/67052/67941/75608
GO:0071346	cellular response to interferon-gamma	3	0.03561	turquoise	12540/64685/66713
GO:0007186	G protein-coupled receptor signaling pathway	4	0.03619	turquoise	12540/14704/14707/16765
GO:0051099	positive regulation of binding	4	0.04065	turquoise	15289/16765/20194/22166
GO:0042989	sequestering of actin monomers	2	0.04127	turquoise	19240/19241
GO:0051649	establishment of localization in cell	22	0.04762	turquoise	110033/12177/12540/12934/13427/17118/17149/17938/18197/19057/20618/22166/22230/56426/66231/66713/67052/68192/71982/72938/75608/80795
GO:0050767	regulation of neurogenesis	5	0.04918	turquoise	107503/14168/17118/20194/66713
GO:0006874	cellular calcium ion homeostasis	3	0.0066	brown	12389/22065/277328	Cav1	Trpa1	Trpc3
GO:0009410	response to xenobiotic stimulus	2	0.0066	brown	19259/277328
GO:0048265	response to pain	2	0.0066	brown	12394/277328
GO:0061178	regulation of insulin secretion involved in cellular response to glucose stimulus	2	0.0066	brown	17932/277328
GO:0070301	cellular response to hydrogen peroxide	2	0.0066	brown	277328/56484
GO:0097553	calcium ion transmembrane import into cytosol	4	0.0067	brown	11607/12389/22065/277328
GO:1903522	regulation of blood circulation	4	0.0067	brown	11607/12389/223780/277328
GO:0014070	response to organic cyclic compound	11	0.007	brown	11607/12389/12550/14675/15562/16533/170790/22065/23959/277328/67792
GO:0050714	positive regulation of protein secretion	3	0.0132	brown	18111/18761/277328
GO:0060326	cell chemotaxis	4	0.0204	brown	11607/14388/17965/18761
GO:0007166	cell surface receptor signaling pathway	31	0.0311	brown	11607/12389/12484/12505/12550/13136/13137/13363/13448/14368/14388/14586/16423/170813/17084/17965/18761/19281/20348/224792/239405/23960/242083/277328/320706/54712/56318/56484/68897/69635/70568
GO:0019731	antibacterial humoral response	2	0.0329	brown	20568/68668
GO:0010466	negative regulation of peptidase activity	3	0.0331	brown	12505/20568/380780
GO:0032496	response to lipopolysaccharide	4	0.0333	brown	13136/13137/17084/20568
GO:1905516	positive regulation of fertilization	2	0.0482	brown	218454/399599
GO:0030199	collagen fibril organization	2	0.00049	blue	12814/195209
GO:0007160	cell-matrix adhesion	3	0.00238	blue	108101/109700/195209
GO:0006915	apoptotic process	24	0.00405	blue	105827/109700/112407/11352/11816/12315/13618/14272/14456/16000/17688/18039/18072/18213/19220/20665/21385/215653/21664/23988/277432/279561/59041/72393
GO:0002683	negative regulation of immune system process	2	0.00495	blue	16000/70312
GO:0030104	water homeostasis	2	0.00495	blue	16000/16678
GO:0048754	branching morphogenesis of an epithelial tube	2	0.00495	blue	16000/21385
GO:2001237	negative regulation of extrinsic apoptotic signaling pathway	2	0.00495	blue	16000/72393
GO:0006417	regulation of translation	3	0.00498	blue	13803/16000/67557
GO:0048839	inner ear development	4	0.005	blue	100503041/12814/16000/21385
GO:0050974	detection of mechanical stimulus involved in sensory perception	4	0.005	blue	100503041/12814/16000/16528	Col11a1	Igf1	Kcnk4	Pdzd7
GO:0010001	glial cell differentiation	6	0.00505	blue	11352/12805/16000/18213/20665/269604
GO:0051924	regulation of calcium ion transport	6	0.00505	blue	11931/12315/13367/16000/279561/98660
GO:1901215	negative regulation of neuron death	7	0.00508	blue	105827/11816/16000/18039/23988/277432/72393
GO:0042060	wound healing	8	0.0051	blue	108101/11816/14456/16000/18791/19339/20170/234695
GO:0032526	response to retinoic acid	3	0.0067	blue	11352/15486/21385
GO:0050728	negative regulation of inflammatory response	3	0.00754	blue	11816/16000/16678
GO:0007186	G protein-coupled receptor signaling pathway	8	0.00969	blue	109294/11816/13610/13618/14687/19220/269604/66066
GO:0048144	fibroblast proliferation	3	0.00995	blue	14456/16000/195209
GO:0006974	cellular response to DNA damage stimulus	4	0.01	blue	112407/116870/17688/231855
GO:0043523	regulation of neuron apoptotic process	8	0.0102	blue	105827/109700/112407/11816/18039/23988/277432/72393
GO:0060271	cilium assembly	4	0.01045	blue	102747/259300/280408/69871
GO:0099560	synaptic membrane adhesion	3	0.01105	blue	192167/23888/76965
GO:0033693	neurofilament bundle assembly	3	0.0191	blue	18039/18040/380684
GO:0060052	neurofilament cytoskeleton organization	3	0.0191	blue	18039/18040/380684
GO:1903078	positive regulation of protein localization to plasma membrane	2	0.0198	blue	279561/72293
GO:0006029	proteoglycan metabolic process	3	0.0199	blue	12814/16000/98388
GO:0000226	microtubule cytoskeleton organization	8	0.02059	blue	100732/102747/18039/18040/207175/260315/380684/69871
GO:0008543	fibroblast growth factor receptor signaling pathway	2	0.02122	blue	21385/67112
GO:0000902	cell morphogenesis	23	0.0221	blue	100503041/108101/109294/109700/110058/11352/11423/11816/12805/13367/18039/18040/18213/192167/19339/215654/23969/26396/277432/380684/59041/76484/76965
GO:0006897	endocytosis	8	0.02253	blue	11423/11816/192167/19376/20614/232227/23969/259300
GO:0050714	positive regulation of protein secretion	2	0.02268	blue	16000/19376
GO:0042472	inner ear morphogenesis	3	0.02488	blue	100503041/12814/21385
GO:0042311	vasodilation	3	0.02753	blue	109700/11816/13618
GO:0035641	locomotory exploration behavior	2	0.03429	blue	11816/98660
GO:0040011	locomotion	20	0.03913	blue	108101/109700/11816/12805/13367/13618/14456/16000/18039/18213/18645/232227/234593/234695/23988/260315/26396/277432/67112/98660
GO:0032148	activation of protein kinase B activity	3	0.04189	blue	14456/16000/18213
GO:0031133	regulation of axon diameter	2	0.04199	blue	18039/18040
GO:0045105	intermediate filament polymerization or depolymerization	2	0.04199	blue	18039/18040
GO:0071333	cellular response to glucose stimulus	4	0.04252	blue	14456/16000/19376/52055
GO:0010466	negative regulation of peptidase activity	6	0.04802	blue	14038/14456/16000/20600/21858/380839
GO:0007157	heterophilic cell-cell adhesion via plasma membrane cell adhesion molecules	3	0.0486	blue	105827/192167/53599
GO:0042592	homeostatic process	21	0.04918	blue	11423/11816/11931/12315/12709/13367/13618/14456/15414/16000/16678/19376/210808/215653/234695/279561/52055/56188/67563/76965/98660
GO:0046889	positive regulation of lipid biosynthetic process	2	0.0495	blue	11816/16000
